# Supplementary material for: Characteristics and Functions of the Rumen Microbial Community of Cattle‐Yak at Different Ages
Source: Hindawi journal article supplement (doi:10.1155/2020/3482692), 2020-01-01
Supplement: f1 [file 3482692.f1.pdf]

## Species composition

Bacteria: 85%, Archaea: 15%      Bacteria: 90%, Archaea: 10%

| Phylum              | 2 years | 3 years |
|---------------------|---------|---------|
| Actinobacteria      | 0.30%   | 0.60%   |
| Bacteroidetes       | 4%      | 4%      |
| Euryarchaeota       | 13%     | 9%      |
| Fibrobacteres       | 19%     | 23%     |
| Firmicutes          | 48%     | 46%     |
| Proteobacteria      | 1%      | 4%      |
| Spirochaetes        | 0.90%   | 2%      |
| <b>Class</b>        |         |         |
| Actinobacteria      | 0.20%   | 0.50%   |
| Bacilli             | 0.09%   | 0%      |
| Bacteroidia         | 3%      | 3%      |
| Clostridia          | 41%     | 40%     |
| Erysipelotrichia    | 0.10%   | 0       |
| Fibrobacteria       | 16%     | 19%     |
| Gammaproteobacteria | 1%      | 3%      |
| Methanobacteria     | 11%     | 8%      |
| Negativicutes       | 0       | 0.03%   |
| Spirochaetia        | 0.80%   | 1%      |
| <b>Order</b>        |         |         |
| Actinomycetales     | 0.20%   | 0.30%   |
| Aeromonadales       | 0.60%   | 2%      |
| Bacteroidales       | 3%      | 2%      |
| Clostridiales       | 34%     | 33%     |
| Coriobacteriales    | 0.04%   | 0.08%   |
| Erysipelotrichales  | 0.10%   | 0       |
| Fibrobacterales     | 13%     | 15%     |
| Methanobacteriales  | 9%      | 6%      |
| Oceanospirillales   | 0.10%   | 0       |
| others              | 13%     |         |
| Spirochaetales      | 0.60%   | 1%      |
| <b>Family</b>       |         |         |
| Coriobacteriaceae   | 0.03%   | 0.06%   |
| Corynebacteriaceae  | 0.10%   | 0.20%   |
| Fibrobacteraceae    | 10%     | 11%     |
| Halomonadaceae      | 0.09%   | 0       |
| Lachnospiraceae     | 24%     | 23%     |
| Methanobacteriaceae | 7%      | 5%      |
| others              |         |         |
| Prevotellaceae      | 2%      | 2%      |
| Ruminococcaceae     | 3%      | 3%      |

|                     |       |       |
|---------------------|-------|-------|
| Spirochaetaceae     | 0.40% | 0.70% |
| Succinivibrionaceae | 0.40% | 2%    |

### Genus

|                           |       |       |
|---------------------------|-------|-------|
| Butyrivibrio              | 16%   | 16%   |
| Corynebacterium           | 0.06% | 0.10% |
| Fibrobacter               | 6%    | 8%    |
| Halomonas                 | 0.06% | 0     |
| Methanobrevibacter        | 5%    | 4%    |
| others                    |       |       |
| Prevotella                | 1%    | 1%    |
| Ruminococcus              | 2%    | 2%    |
| Subdoligranulum           | 0.02% | 0.05% |
| Succinivibrionaceae-uncla | 0.20% | 0.80% |
| Treponema                 | 0.30% | 0.50% |

### Species

|                           |       |       |
|---------------------------|-------|-------|
| Butyrivibrio-fibrisolvens | 0.20% | 0.06% |
| Butyrivibrio-unclassified | 8%    | 8%    |
| Corynebacterium-maris     | 0.03% | 0.07% |
| Fibrobacter-succinogenes  | 3%    | 4%    |
| Methanobrevibacter-rumina | 0.30% | 2%    |
| Methanobrevibacter-unclas | 2%    | 0     |
| others                    |       |       |
| Prevotella-ruminicola     | 0.70% | 0.60% |
| Ruminococcus-albus        | 0.06% | 0.07% |
| Ruminococcus-flavefaciens | 1%    | 0.90% |
| Treponema-bryantii        | 0.20% | 0.30% |

## CAZy database

| GH Family     |        | GT Family               |        | CE Family |        | CBM Family |        |
|---------------|--------|-------------------------|--------|-----------|--------|------------|--------|
| Genes         | Number | Genes                   | Number | Genes     | Number | Genes      | Number |
| cohesin. hmm  | 29     | GT1. hmm                | 238    | CE1. hmm  | 3018   | CBM10. hmm | 1      |
| dockerin. hmm | 415    | GT10. hmm               | 54     | CE10. hmm | 2264   | CBM11. hmm | 21     |
| GH1. hmm      | 160    | GT101. hmm              | 14     | CE11. hmm | 171    | CBM12. hmm | 61     |
| GH10. hmm     | 611    | GT102. hmm              | 10     | CE12. hmm | 427    | CBM13. hmm | 215    |
| GH100. hmm    | 39     | GT103. hmm              | 2      | CE13. hmm | 19     | CBM14. hmm | 8      |
| GH101. hmm    | 9      | GT104. hmm              | 5      | CE14. hmm | 165    | CBM16. hmm | 139    |
| GH102. hmm    | 4      | GT11. hmm               | 70     | CE15. hmm | 327    | CBM17. hmm | 1      |
| GH103. hmm    | 22     | GT12. hmm               | 675    | CE2. hmm  | 608    | CBM18. hmm | 1      |
| GH105. hmm    | 352    | GT13. hmm               | 153    | CE3. hmm  | 772    | CBM19. hmm | 2      |
| GH106. hmm    | 966    | GT14. hmm               | 43     | CE4. hmm  | 684    | CBM2. hmm  | 53     |
| GH107. hmm    | 5      | GT17. hmm               | 8      | CE5. hmm  | 4      | CBM20. hmm | 207    |
| GH108. hmm    | 22     | GT19. hmm               | 332    | CE6. hmm  | 341    | CBM22. hmm | 151    |
| GH109. hmm    | 746    | GT2. hmm                | 4090   | CE7. hmm  | 1093   | CBM23. hmm | 37     |
| GH11. hmm     | 120    | GT2_Cellulose_synt. hmm | 8      | CE8. hmm  | 197    | CBM25. hmm | 15     |
| GH110. hmm    | 86     | GT20. hmm               | 107    | CE9. hmm  | 794    | CBM26. hmm | 146    |
| GH112. hmm    | 14     | GT21. hmm               | 1083   |           |        | CBM28. hmm | 1      |
| GH113. hmm    | 84     | GT22. hmm               | 23     |           |        | CBM3. hmm  | 42     |
| GH114. hmm    | 26     | GT23. hmm               | 46     |           |        | CBM30. hmm | 69     |
| GH115. hmm    | 279    | GT24. hmm               | 45     |           |        | CBM31. hmm | 1      |
| GH116. hmm    | 70     | GT25. hmm               | 10     |           |        | CBM32. hmm | 714    |
| GH117. hmm    | 712    | GT26. hmm               | 93     |           |        | CBM34. hmm | 44     |
| GH118. hmm    | 7      | GT27. hmm               | 2477   |           |        | CBM35. hmm | 579    |
| GH119. hmm    | 120    | GT28. hmm               | 485    |           |        | CBM36. hmm | 179    |
| GH120. hmm    | 98     | GT3. hmm                | 275    |           |        | CBM37. hmm | 233    |
| GH121. hmm    | 79     | GT30. hmm               | 125    |           |        | CBM38. hmm | 26     |
| GH123. hmm    | 91     | GT31. hmm               | 1      |           |        | CBM4. hmm  | 268    |
| GH124. hmm    | 182    | GT32. hmm               | 181    |           |        | CBM40. hmm | 92     |
| GH125. hmm    | 77     | GT33. hmm               | 74     |           |        | CBM41. hmm | 18     |
| GH126. hmm    | 34     | GT34. hmm               | 1      |           |        | CBM42. hmm | 2      |
| GH127. hmm    | 410    | GT35. hmm               | 514    |           |        | CBM44. hmm | 159    |
| GH128. hmm    | 81     | GT38. hmm               | 7      |           |        | CBM45. hmm | 13     |
| GH129. hmm    | 81     | GT39. hmm               | 158    |           |        | CBM46. hmm | 15     |
| GH13. hmm     | 1623   | GT4. hmm                | 2881   |           |        | CBM47. hmm | 81     |
| GH13_1. hmm   | 1186   | GT40. hmm               | 200    |           |        | CBM48. hmm | 521    |
| GH13_10. hmm  | 882    | GT41. hmm               | 2120   |           |        | CBM49. hmm | 10     |
| GH13_11. hmm  | 797    | GT44. hmm               | 65     |           |        | CBM5. hmm  | 25     |
| GH13_12. hmm  | 38     | GT45. hmm               | 1471   |           |        | CBM50. hmm | 839    |
| GH13_13. hmm  | 164    | GT46. hmm               | 11     |           |        | CBM51. hmm | 80     |
| GH13_14. hmm  | 199    | GT49. hmm               | 1      |           |        | CBM52. hmm | 3      |
| GH13_15. hmm  | 396    | GT5. hmm                | 2325   |           |        | CBM53. hmm | 1      |
| GH13_16. hmm  | 1070   | GT50. hmm               | 3      |           |        | CBM54. hmm | 5      |
| GH13_17. hmm  | 1076   | GT51. hmm               | 480    |           |        | CBM56. hmm | 218    |
| GH13_18. hmm  | 272    | GT52. hmm               | 1      |           |        | CBM57. hmm | 25     |
| GH13_19. hmm  | 1053   | GT54. hmm               | 1      |           |        | CBM58. hmm | 22     |
| GH13_2. hmm   | 1207   | GT56. hmm               | 20     |           |        | CBM59. hmm | 2      |
| GH13_20. hmm  | 1258   | GT57. hmm               | 10     |           |        | CBM6. hmm  | 782    |
| GH13_21. hmm  | 702    | GT58. hmm               | 2      |           |        | CBM60. hmm | 9      |
| GH13_22. hmm  | 314    | GT59. hmm               | 1      |           |        | CBM61. hmm | 185    |

|              |      |           |      |            |     |
|--------------|------|-----------|------|------------|-----|
| GH13_23. hmm | 974  | GT6. hmm  | 7    | CBM62. hmm | 88  |
| GH13_24. hmm | 214  | GT60. hmm | 6    | CBM63. hmm | 30  |
| GH13_25. hmm | 137  | GT62. hmm | 20   | CBM65. hmm | 1   |
| GH13_26. hmm | 697  | GT63. hmm | 2    | CBM66. hmm | 97  |
| GH13_27. hmm | 527  | GT64. hmm | 4    | CBM67. hmm | 655 |
| GH13_28. hmm | 37   | GT66. hmm | 73   | CBM69. hmm | 38  |
| GH13_29. hmm | 1026 | GT69. hmm | 23   | CBM70. hmm | 18  |
| GH13_3. hmm  | 362  | GT7. hmm  | 25   | CBM71. hmm | 12  |
| GH13_30. hmm | 947  | GT70. hmm | 1    | CBM72. hmm | 29  |
| GH13_31. hmm | 1072 | GT71. hmm | 8    | CBM73. hmm | 5   |
| GH13_32. hmm | 670  | GT73. hmm | 13   | CBM74. hmm | 2   |
| GH13_33. hmm | 73   | GT74. hmm | 82   | CBM75. hmm | 40  |
| GH13_34. hmm | 593  | GT75. hmm | 4    | CBM76. hmm | 1   |
| GH13_35. hmm | 718  | GT76. hmm | 25   | CBM77. hmm | 13  |
| GH13_36. hmm | 1361 | GT77. hmm | 4    | CBM78. hmm | 4   |
| GH13_37. hmm | 972  | GT8. hmm  | 263  | CBM79. hmm | 17  |
| GH13_38. hmm | 755  | GT81. hmm | 1547 | CBM8. hmm  | 4   |
| GH13_39. hmm | 327  | GT83. hmm | 314  | CBM80. hmm | 3   |
| GH13_4. hmm  | 922  | GT84. hmm | 22   | CBM9. hmm  | 117 |
| GH13_40. hmm | 1049 | GT87. hmm | 9    |            |     |
| GH13_41. hmm | 77   | GT89. hmm | 2    |            |     |
| GH13_42. hmm | 14   | GT9. hmm  | 171  |            |     |
| GH13_5. hmm  | 557  | GT90. hmm | 13   |            |     |
| GH13_6. hmm  | 532  | GT92. hmm | 86   |            |     |
| GH13_7. hmm  | 737  | GT93. hmm | 1    |            |     |
| GH13_8. hmm  | 744  | GT94. hmm | 175  |            |     |
| GH13_9. hmm  | 775  | GT95. hmm | 1    |            |     |
| GH130. hmm   | 431  | GT97. hmm | 1    |            |     |
| GH133. hmm   | 181  | GT98. hmm | 1    |            |     |
| GH136. hmm   | 62   | GT99. hmm | 7    |            |     |
| GH137. hmm   | 113  |           |      |            |     |
| GH138. hmm   | 59   |           |      |            |     |
| GH139. hmm   | 131  |           |      |            |     |
| GH14. hmm    | 8    |           |      |            |     |
| GH140. hmm   | 68   |           |      |            |     |
| GH141. hmm   | 224  |           |      |            |     |
| GH142. hmm   | 85   |           |      |            |     |
| GH143. hmm   | 32   |           |      |            |     |
| GH144. hmm   | 38   |           |      |            |     |
| GH145. hmm   | 13   |           |      |            |     |
| GH15. hmm    | 58   |           |      |            |     |
| GH16. hmm    | 334  |           |      |            |     |
| GH17. hmm    | 2    |           |      |            |     |
| GH18. hmm    | 204  |           |      |            |     |
| GH19. hmm    | 13   |           |      |            |     |
| GH2. hmm     | 2181 |           |      |            |     |
| GH20. hmm    | 408  |           |      |            |     |
| GH23. hmm    | 444  |           |      |            |     |
| GH24. hmm    | 85   |           |      |            |     |
| GH25. hmm    | 442  |           |      |            |     |
| GH26. hmm    | 260  |           |      |            |     |

|              |      |
|--------------|------|
| GH27. hmm    | 301  |
| GH28. hmm    | 514  |
| GH29. hmm    | 432  |
| GH3. hmm     | 1347 |
| GH30. hmm    | 256  |
| GH30_1. hmm  | 200  |
| GH30_2. hmm  | 157  |
| GH30_3. hmm  | 122  |
| GH30_4. hmm  | 154  |
| GH30_5. hmm  | 157  |
| GH30_6. hmm  | 159  |
| GH30_7. hmm  | 197  |
| GH30_8. hmm  | 135  |
| GH31. hmm    | 896  |
| GH32. hmm    | 560  |
| GH33. hmm    | 323  |
| GH35. hmm    | 155  |
| GH36. hmm    | 697  |
| GH37. hmm    | 120  |
| GH38. hmm    | 75   |
| GH39. hmm    | 332  |
| GH4. hmm     | 105  |
| GH42. hmm    | 287  |
| GH43. hmm    | 1902 |
| GH43_1. hmm  | 990  |
| GH43_10. hmm | 928  |
| GH43_11. hmm | 739  |
| GH43_12. hmm | 817  |
| GH43_13. hmm | 539  |
| GH43_14. hmm | 612  |
| GH43_15. hmm | 340  |
| GH43_16. hmm | 289  |
| GH43_17. hmm | 747  |
| GH43_18. hmm | 193  |
| GH43_19. hmm | 290  |
| GH43_2. hmm  | 851  |
| GH43_20. hmm | 87   |
| GH43_21. hmm | 99   |
| GH43_22. hmm | 105  |
| GH43_23. hmm | 51   |
| GH43_24. hmm | 389  |
| GH43_25. hmm | 34   |
| GH43_26. hmm | 218  |
| GH43_27. hmm | 221  |
| GH43_28. hmm | 775  |
| GH43_29. hmm | 964  |
| GH43_3. hmm  | 1395 |
| GH43_30. hmm | 1150 |
| GH43_31. hmm | 1217 |
| GH43_32. hmm | 730  |
| GH43_33. hmm | 1187 |

|              |      |
|--------------|------|
| GH43_34. hmm | 933  |
| GH43_35. hmm | 871  |
| GH43_36. hmm | 442  |
| GH43_37. hmm | 421  |
| GH43_4. hmm  | 1041 |
| GH43_5. hmm  | 962  |
| GH43_6. hmm  | 563  |
| GH43_7. hmm  | 246  |
| GH43_8. hmm  | 1034 |
| GH43_9. hmm  | 829  |
| GH44. hmm    | 61   |
| GH45. hmm    | 85   |
| GH47. hmm    | 1    |
| GH48. hmm    | 7    |
| GH49. hmm    | 20   |
| GH5. hmm     | 1553 |
| GH5_1. hmm   | 364  |
| GH5_10. hmm  | 58   |
| GH5_11. hmm  | 46   |
| GH5_12. hmm  | 155  |
| GH5_13. hmm  | 61   |
| GH5_14. hmm  | 205  |
| GH5_15. hmm  | 174  |
| GH5_16. hmm  | 28   |
| GH5_17. hmm  | 14   |
| GH5_18. hmm  | 35   |
| GH5_19. hmm  | 540  |
| GH5_2. hmm   | 163  |
| GH5_20. hmm  | 45   |
| GH5_21. hmm  | 139  |
| GH5_22. hmm  | 635  |
| GH5_23. hmm  | 38   |
| GH5_24. hmm  | 106  |
| GH5_25. hmm  | 748  |
| GH5_26. hmm  | 408  |
| GH5_27. hmm  | 212  |
| GH5_28. hmm  | 304  |
| GH5_29. hmm  | 389  |
| GH5_30. hmm  | 56   |
| GH5_31. hmm  | 27   |
| GH5_32. hmm  | 44   |
| GH5_33. hmm  | 14   |
| GH5_34. hmm  | 18   |
| GH5_35. hmm  | 90   |
| GH5_36. hmm  | 507  |
| GH5_37. hmm  | 622  |
| GH5_38. hmm  | 490  |
| GH5_39. hmm  | 626  |
| GH5_4. hmm   | 664  |
| GH5_40. hmm  | 268  |
| GH5_41. hmm  | 44   |

|             |     |
|-------------|-----|
| GH5_42. hmm | 152 |
| GH5_43. hmm | 39  |
| GH5_44. hmm | 177 |
| GH5_45. hmm | 159 |
| GH5_46. hmm | 657 |
| GH5_47. hmm | 49  |
| GH5_48. hmm | 256 |
| GH5_49. hmm | 96  |
| GH5_5. hmm  | 553 |
| GH5_50. hmm | 155 |
| GH5_51. hmm | 93  |
| GH5_52. hmm | 463 |
| GH5_53. hmm | 52  |
| GH5_7. hmm  | 226 |
| GH5_8. hmm  | 14  |
| GH5_9. hmm  | 277 |
| GH50. hmm   | 68  |
| GH51. hmm   | 685 |
| GH53. hmm   | 242 |
| GH54. hmm   | 35  |
| GH55. hmm   | 128 |
| GH57. hmm   | 204 |
| GH59. hmm   | 81  |
| GH62. hmm   | 4   |
| GH63. hmm   | 98  |
| GH64. hmm   | 13  |
| GH65. hmm   | 67  |
| GH66. hmm   | 24  |
| GH67. hmm   | 183 |
| GH68. hmm   | 5   |
| GH70. hmm   | 100 |
| GH71. hmm   | 4   |
| GH72. hmm   | 53  |
| GH73. hmm   | 227 |
| GH74. hmm   | 308 |
| GH76. hmm   | 217 |
| GH77. hmm   | 456 |
| GH78. hmm   | 970 |
| GH79. hmm   | 91  |
| GH8. hmm    | 214 |
| GH81. hmm   | 11  |
| GH82. hmm   | 44  |
| GH84. hmm   | 16  |
| GH85. hmm   | 17  |
| GH86. hmm   | 58  |
| GH87. hmm   | 96  |
| GH88. hmm   | 130 |
| GH89. hmm   | 138 |
| GH9. hmm    | 659 |
| GH91. hmm   | 7   |
| GH92. hmm   | 523 |

|           |     |
|-----------|-----|
| GH93. hmm | 210 |
| GH94. hmm | 562 |
| GH95. hmm | 502 |
| GH96. hmm | 1   |
| GH97. hmm | 724 |
| GH98. hmm | 7   |
| GH99. hmm | 122 |



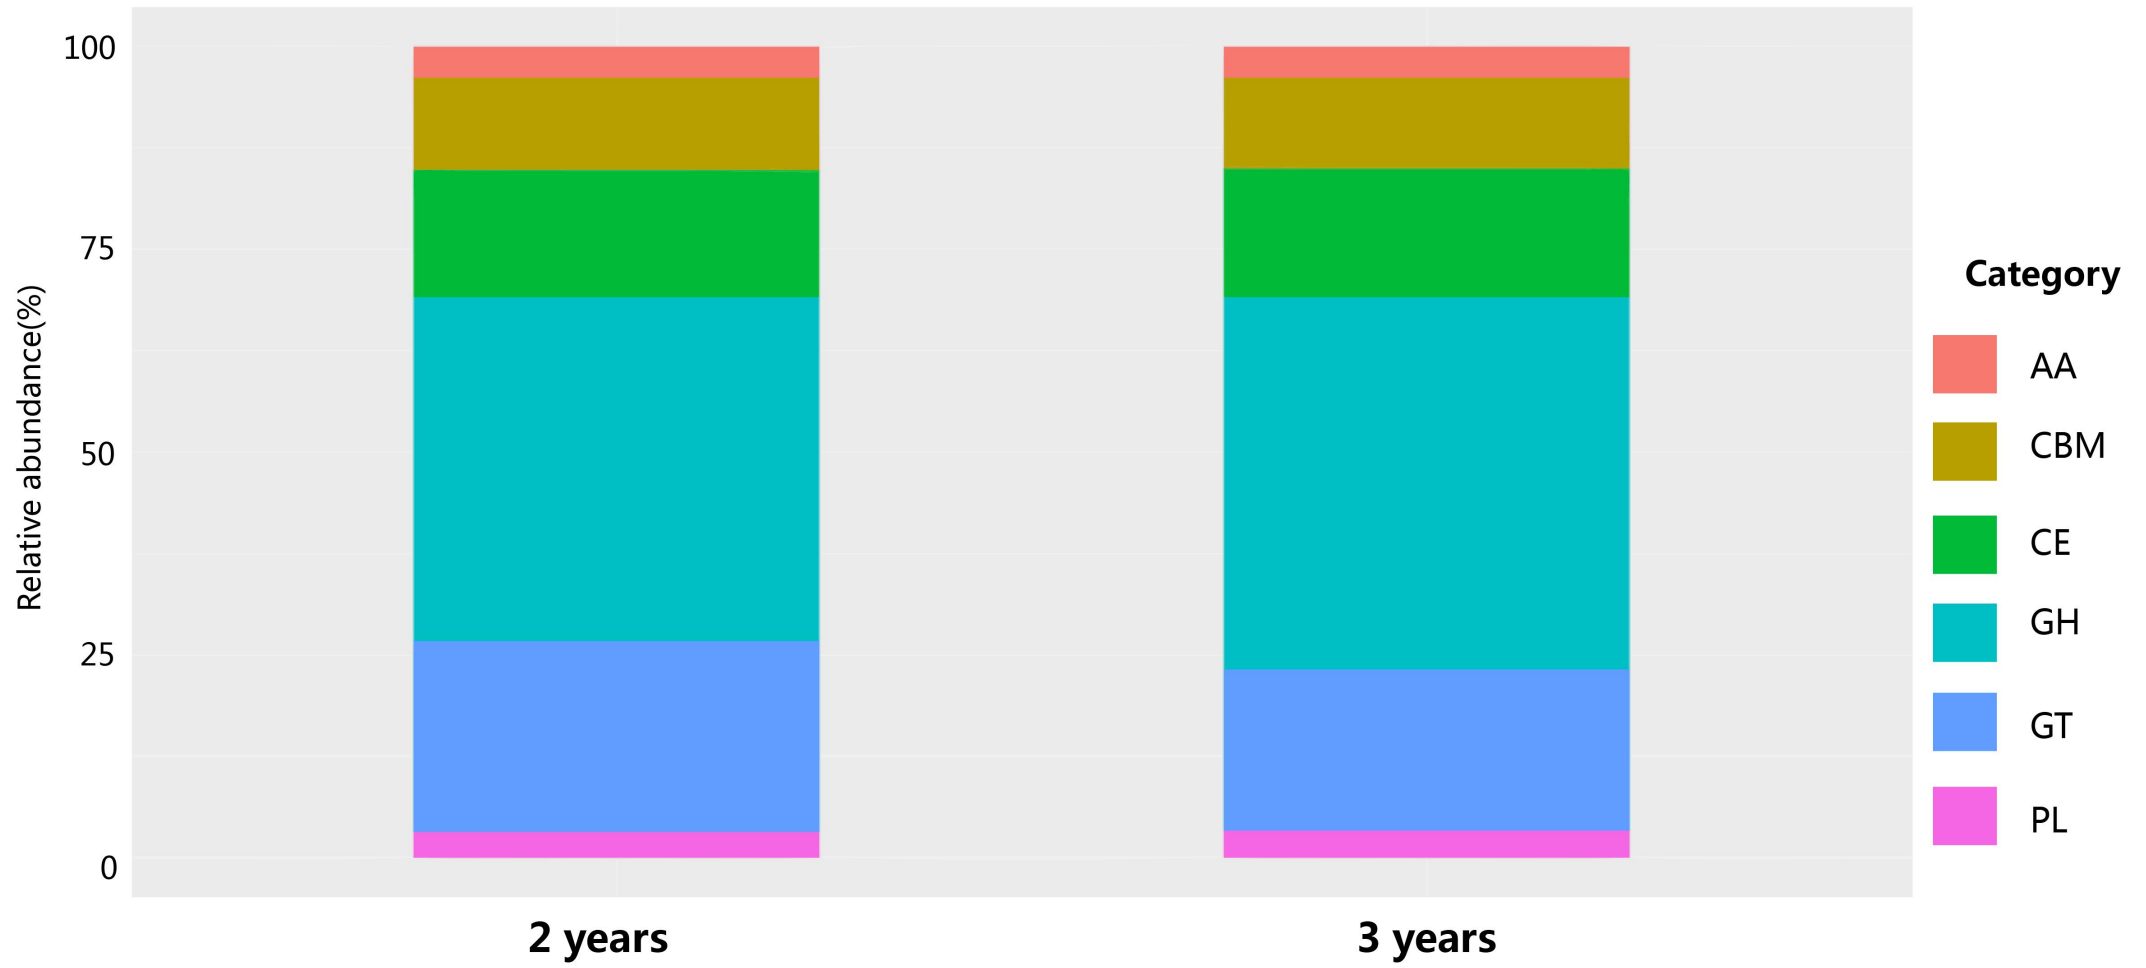

Fig S1 Functional abundance of CAZy at different ages

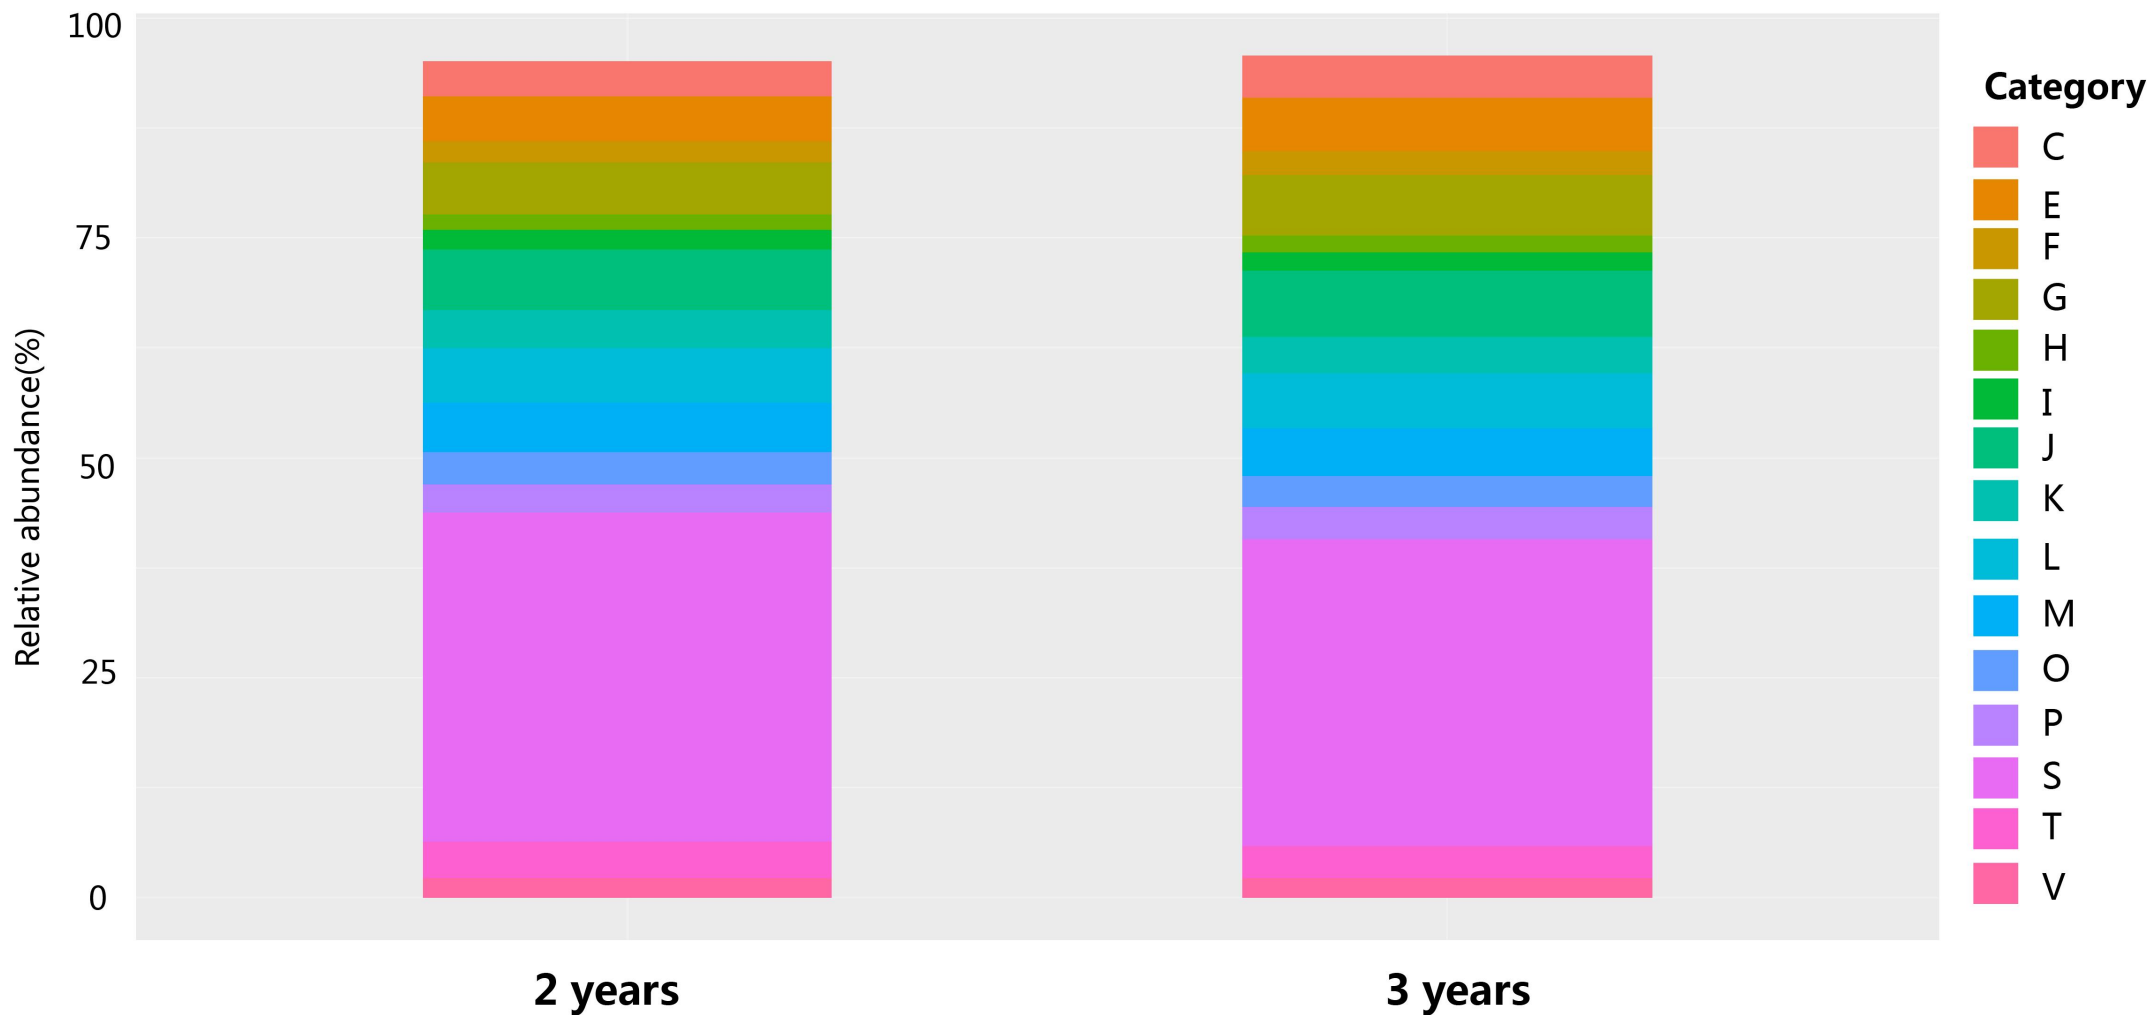

Fig S2 Functional abundance of eggNOG in different age groups

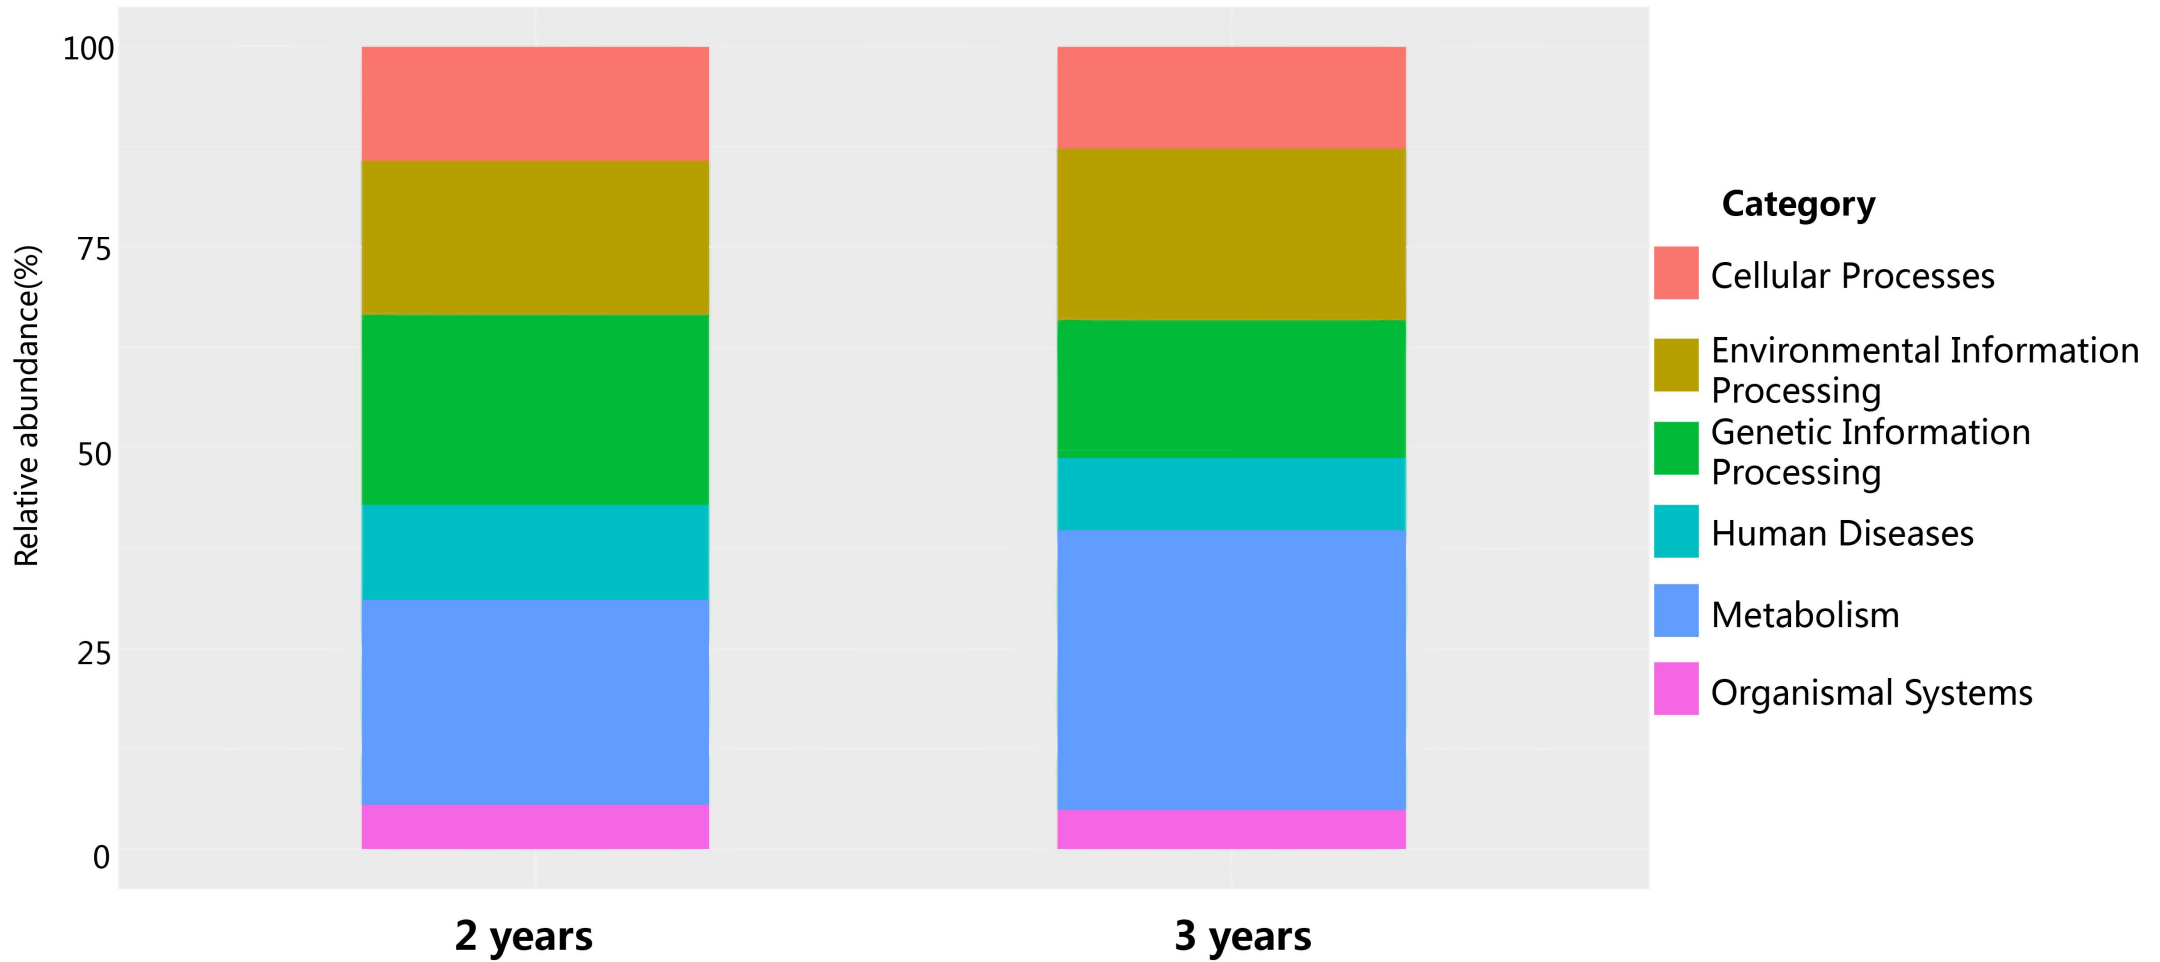

Fig S3 KEGG functional abundance in different age groups

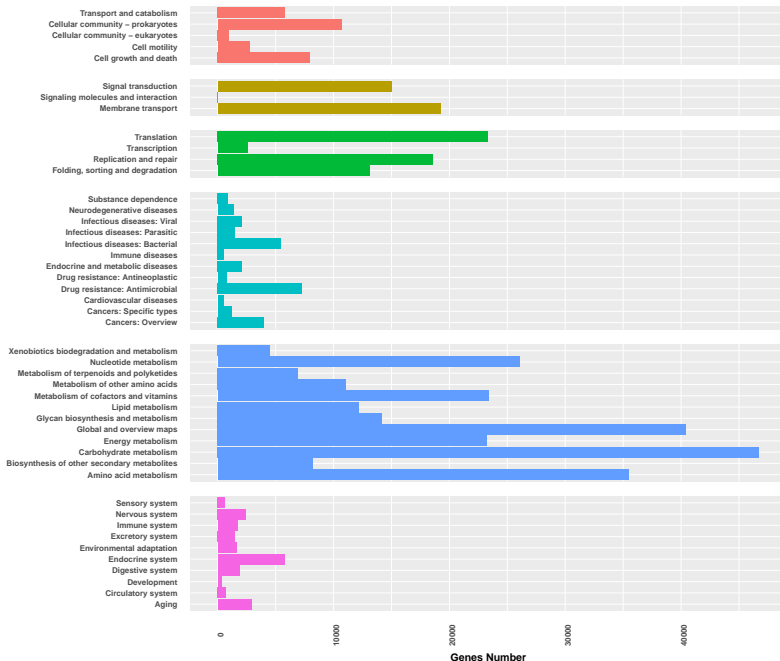

# Fig S4
